# Supplementary material for: Local structure in a tetravalent-substituent BIMEVOX system: BIGEVOX
Source: Royal Society of Chemistry journal article supplement (doi:10.1039/d1ta07547k), 2022-01-01
Supplement: d1ta07547k1.pdf [file d1ta07547k1.pdf]

## Supporting Information

### Local Structure in a Tetravalent-Substituent BIMEVOX system: BIGEVOX

Yajun Yue,<sup>a</sup> Aleksandra Dzięgielewska,<sup>b</sup> Stephen Hull,<sup>c</sup> Franciszek Krok,<sup>b</sup> Richard M. Whiteley,<sup>d</sup>  
Harold Toms,<sup>a</sup> Marcin Malys,<sup>b</sup> Man Zhang,<sup>d</sup> Haixue Yan<sup>d</sup> and Isaac Abrahams<sup>\*a</sup>

<sup>a</sup>Department of Chemistry, Queen Mary University of London, Mile End Road London, E1 4NS,  
U.K.

<sup>b</sup>Faculty of Physics, Warsaw University of Technology, ul. Koszykowa 75, 00-662 Warsaw,  
Poland.

<sup>c</sup>Science and Technology Facilities Council, ISIS Facility, Rutherford Appleton Laboratory,  
Chilton, Didcot, Oxon. OX11 0QX, U.K.

<sup>d</sup>School of Engineering and Materials Science, Queen Mary University of London, Mile End Road  
London, E1 4NS, U.K.

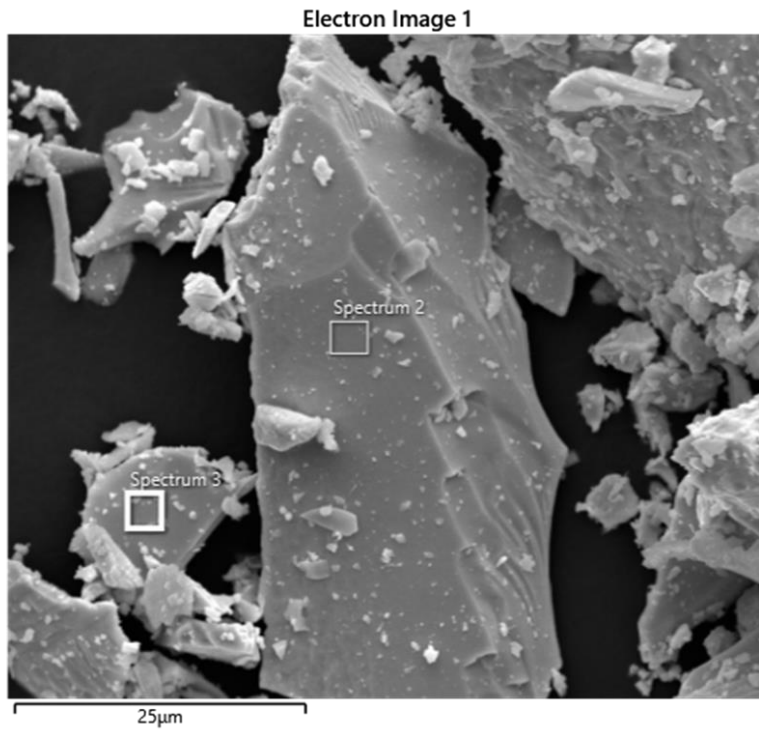

Fig. S1 SEM image of  $\text{Bi}_2\text{V}_{0.65}\text{Ge}_{0.35}\text{O}_{5.325}$  powder used for EDX analysis.

Table S1 Comparison of theoretical and average EDX analysis values for constituent elements in

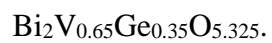

|              | Bi      | V      | Ge     | O       |
|--------------|---------|--------|--------|---------|
| EDX analysis | 23.61 % | 7.67 % | 4.43 % | 63.30 % |
| Theoretical  | 24.02 % | 7.81 % | 4.20 % | 63.96 % |

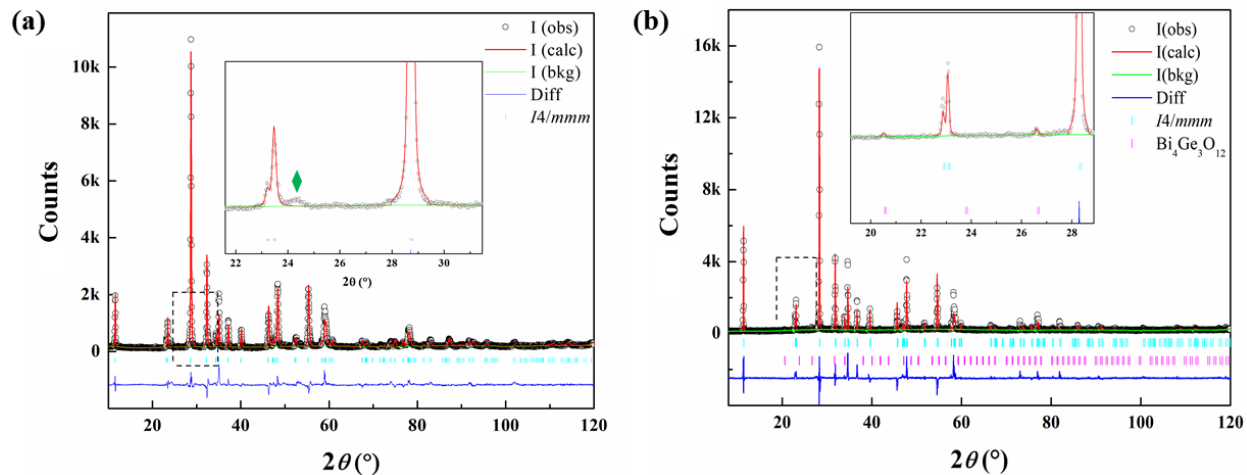

Fig. S2. Fitted diffraction profiles for BIGEVOX35 at room temperature showing fits to XRD data at (a) 25 °C and (b) 700 °C. The insets show the variation of a superlattice peak at *ca.* 24.2° 2θ at the two studied temperatures.

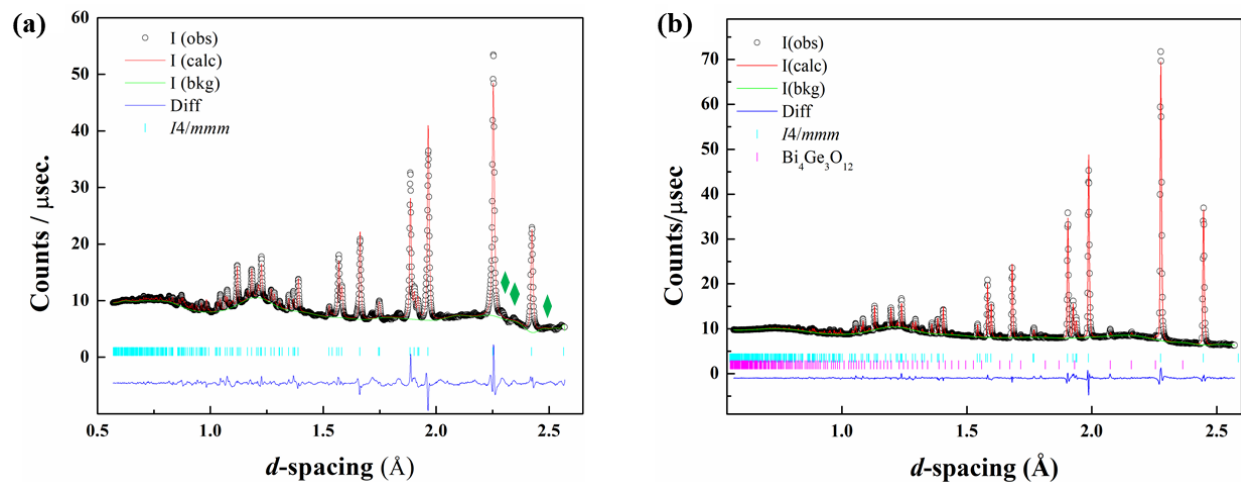

Fig. S3. Fitted diffraction profiles for BIGEVOX35 at room temperature showing fits to neutron back-scattering data at (a) 25 °C and (b) 700 °C. The green symbols mark a set of superlattice peak observed at 25 °C due to the incommensurate modulation of the  $\gamma'$ -phase.

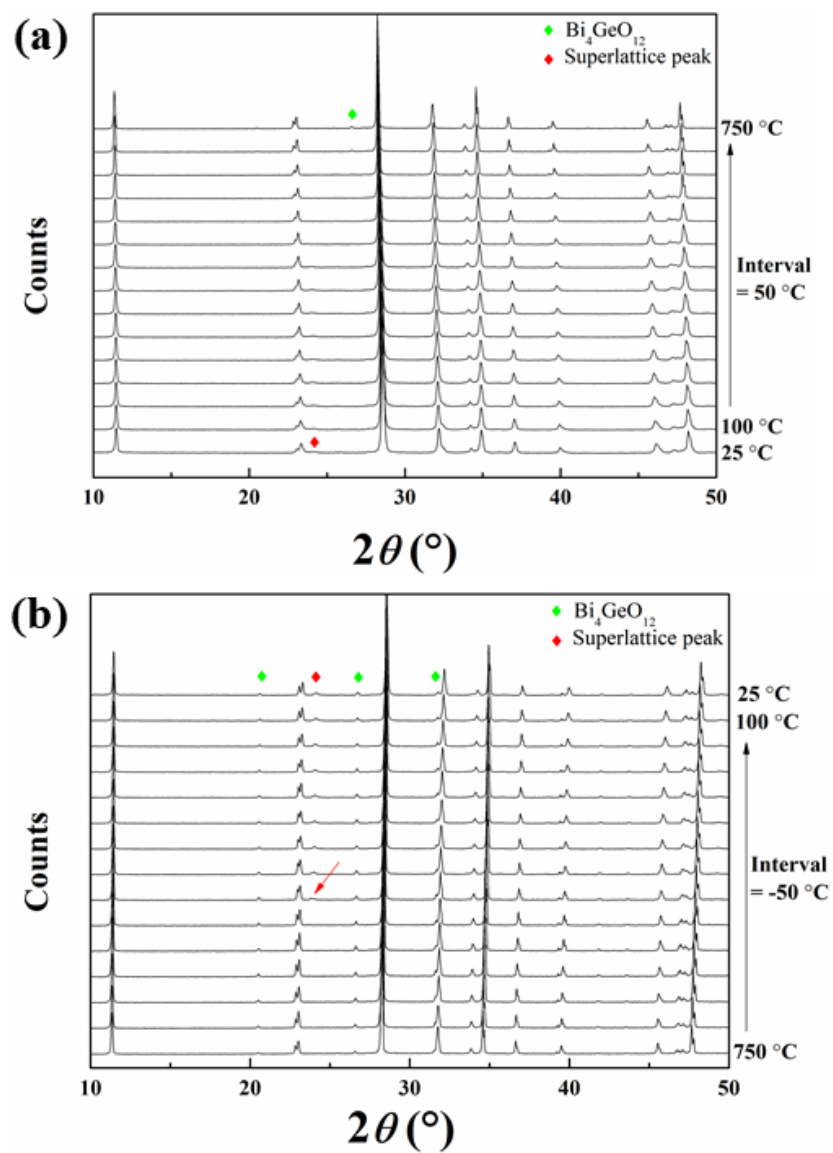

Fig. S4. Thermal variation of X-ray diffraction patterns for BIGEVOX35 on heating and cooling between 25 °C and 750 °C.

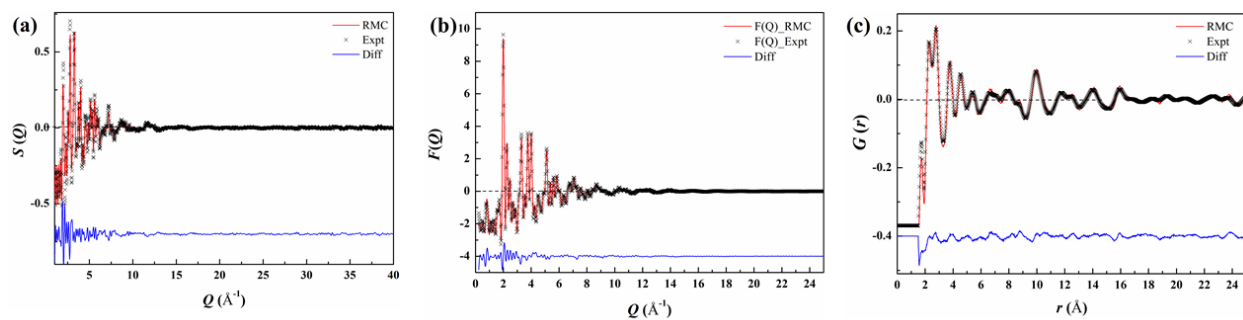

Fig. S5. Representative fitted profiles for BIGEVOX35 at 25 °C derived from RMC calculations showing (a) neutron  $S(Q)$ , (b) X-ray  $F(Q)$  and (c)  $G(r)$ .

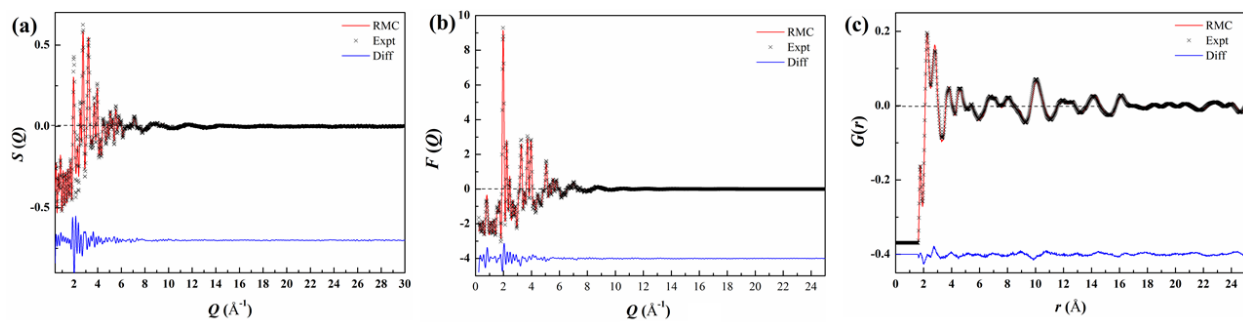

Fig. S6. Representative fitted profiles for BIGEVOX35 at 700 °C derived from RMC calculations showing (a) neutron  $S(Q)$ , (b) X-ray  $F(Q)$  and (c)  $G(r)$ .

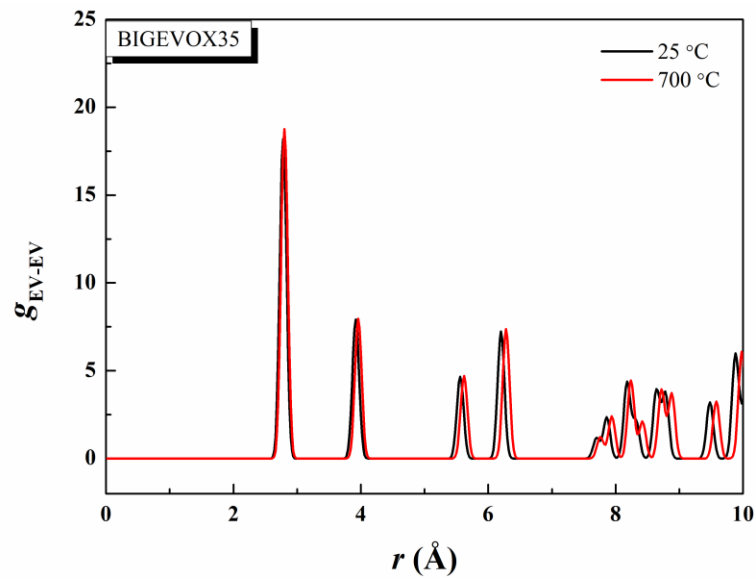

Fig. S7. Partial PDFs for EV-EV pairs in BIGEVOX35 at 25 and 700 °C. For clarity, the distribution functions at the two temperatures are smoothed over 10 cycles.

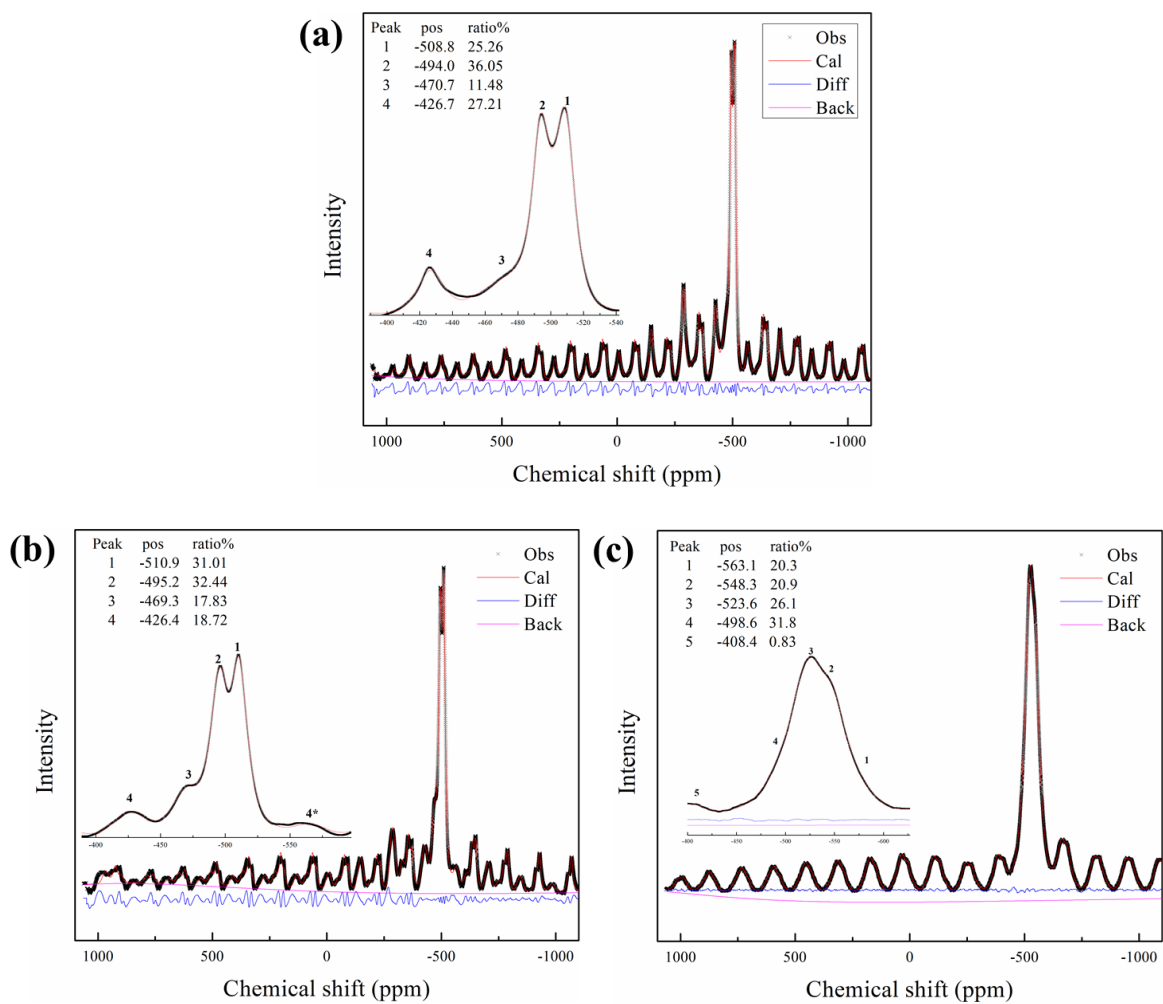

Fig. S8. Fitted  $^{51}\text{V}$  solid-state NMR spectra for  $\text{Bi}_2\text{V}_{1-x}\text{Ge}_x\text{O}_{5.5-0.5x-\delta}$  compositions: (a)  $x = 0.0$ , (b)  $x = 0.05$ , and (c)  $x = 0.35$ .

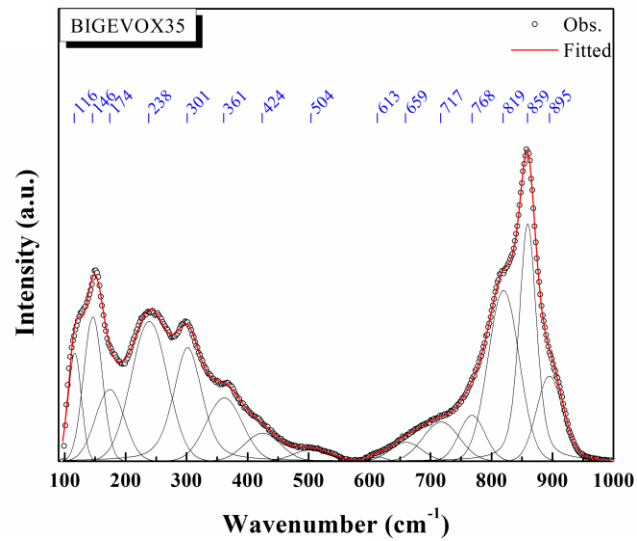

Fig. S9. Fitted Raman spectrum for BIGEVOX35 at room temperature.



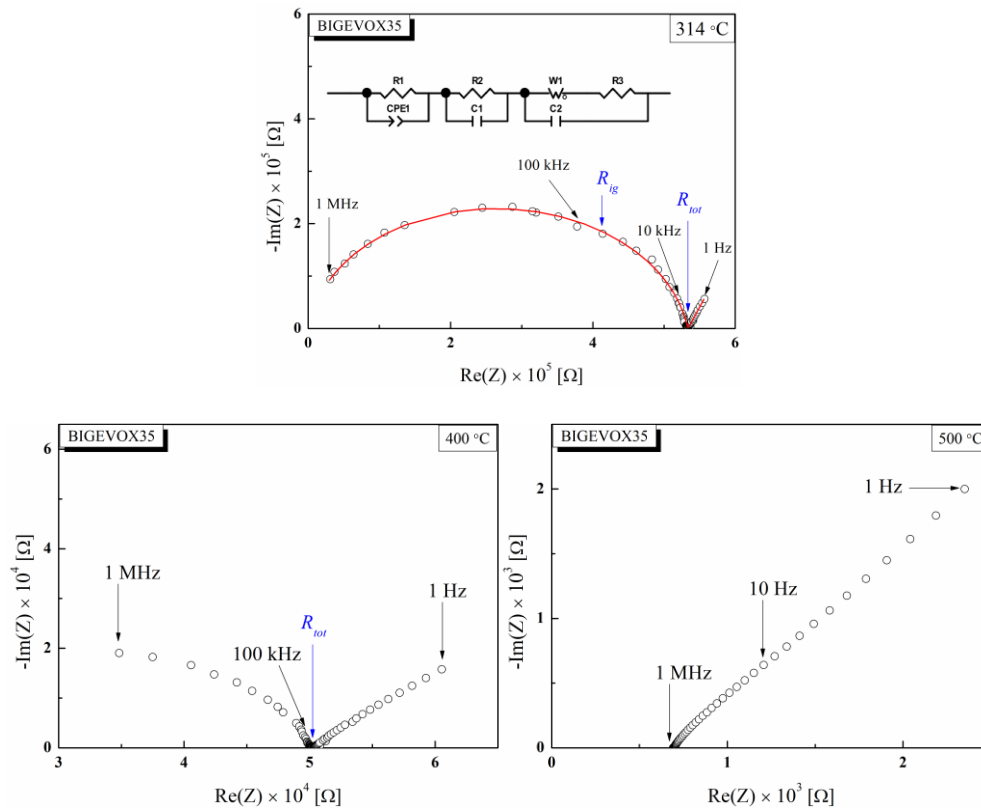

Fig. S10. Typical Nyquist plots at selected temperatures (314, 400 and 500 °C) for Bi<sub>2</sub>V<sub>0.65</sub>Ge<sub>0.35</sub>O<sub>5.325</sub>, with fits shown at 314 °C. The equivalent circuit used is shown inset, which consists of resistors  $R$ , capacitors  $C$ , and constant phase elements  $CPE$  to model intragrain ( $ig$ ), and intergrain ( $gb$ ) dispersions.

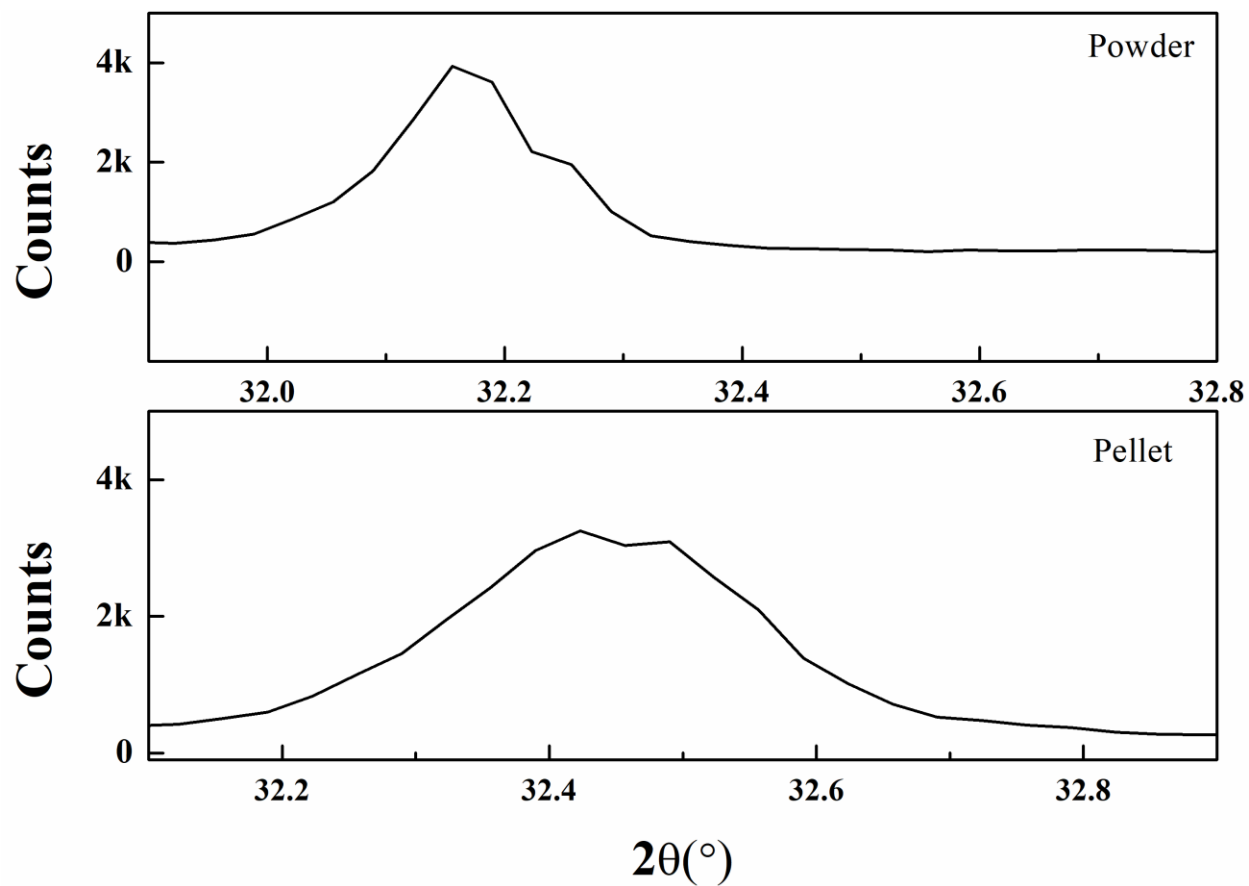

Fig. S11. Detail of room temperature X-ray powder diffraction patterns for BIGEVOX35 prepared as powder (upper) and ceramic pellet (lower) showing (200)/(020) mean cell peaks.

Table S2. Thermal expansion coefficients for BIGEVOX35 at low and high temperatures.

| Temp. region                         | Thermal expansion coefficient, $\alpha$ ( $^{\circ}\text{C}^{-1}$ ) |                       |                       |
|--------------------------------------|---------------------------------------------------------------------|-----------------------|-----------------------|
|                                      | <i>a</i> -axis                                                      | <i>c</i> -axis        | Cell volume           |
| LT (< 500 $^{\circ}\text{C}$ )       | $1.82 \times 10^{-5}$                                               | $1.67 \times 10^{-3}$ | $2.26 \times 10^{-3}$ |
| HT ( $\geq$ 500 $^{\circ}\text{C}$ ) | $1.52 \times 10^{-5}$                                               | $3.84 \times 10^{-3}$ | $4.80 \times 10^{-3}$ |

Table S3. Crystal and refinement parameters for BIGEVOX35 at 25  $^{\circ}\text{C}$  and 700  $^{\circ}\text{C}$ .

| Sample Name                           |                          | BIGEVOX35                                                                                                    |                                                                                                              |                                       |
|---------------------------------------|--------------------------|--------------------------------------------------------------------------------------------------------------|--------------------------------------------------------------------------------------------------------------|---------------------------------------|
| Temperature ( $^{\circ}\text{C}$ )    |                          | 20 $^{\circ}\text{C}$                                                                                        | 700 $^{\circ}\text{C}$                                                                                       |                                       |
|                                       |                          |                                                                                                              | Phase 1                                                                                                      | Phase 2                               |
| Chemical formula                      |                          | $\text{Bi}_2\text{V}_{0.65}\text{Ge}_{0.35}\text{O}_{5.325}$                                                 | $\text{Bi}_2\text{V}_{0.65}\text{Ge}_{0.35}\text{O}_{5.325}$                                                 | $\text{Bi}_4\text{Ge}_3\text{O}_{12}$ |
| Crystal system                        |                          | <i>I</i> 4/ <i>mmm</i>                                                                                       | <i>I</i> 4/ <i>mmm</i>                                                                                       | <i>I</i> -43 <i>d</i>                 |
| Phase fraction                        |                          | 100%                                                                                                         | 98.52(3)%                                                                                                    | 1.47(7)%                              |
| Lattice parameter(s) ( $\text{\AA}$ ) |                          | <i>a</i> = 3.9268(4)<br><i>c</i> = 15.387(1)                                                                 | <i>a</i> = 3.9718(1)<br><i>c</i> = 15.5183(4)                                                                | <i>a</i> = 10.574(1)                  |
| Volume ( $\text{\AA}^3$ )             |                          | 237.27(7)                                                                                                    | 244.80(2)                                                                                                    | 1182.3(4)                             |
| Z                                     |                          | 2                                                                                                            | 2                                                                                                            | 4                                     |
| Density (calc) $\text{g cm}^{-3}$     |                          | 7.862                                                                                                        | 7.619                                                                                                        | 6.998                                 |
| R-factors                             | Neutron back scattering  | $R_{\text{wp}} = 0.0183$<br>$R_{\text{p}} = 0.0267$<br>$R_{\text{ex}} = 0.0037$<br>$R_{\text{F}}^2 = 0.1149$ | $R_{\text{wp}} = 0.0088$<br>$R_{\text{p}} = 0.0118$<br>$R_{\text{ex}} = 0.0037$<br>$R_{\text{F}}^2 = 0.1509$ |                                       |
|                                       | Neutron 90 $^{\circ}$    | $R_{\text{wp}} = 0.0218$<br>$R_{\text{p}} = 0.0283$<br>$R_{\text{ex}} = 0.0022$<br>$R_{\text{F}}^2 = 0.1402$ | $R_{\text{wp}} = 0.0100$<br>$R_{\text{p}} = 0.0133$<br>$R_{\text{ex}} = 0.0022$<br>$R_{\text{F}}^2 = 0.1351$ |                                       |
|                                       | X-ray                    | $R_{\text{wp}} = 0.1326$<br>$R_{\text{p}} = 0.0952$<br>$R_{\text{ex}} = 0.0607$<br>$R_{\text{F}}^2 = 0.2268$ | $R_{\text{wp}} = 0.1563$<br>$R_{\text{p}} = 0.1126$<br>$R_{\text{ex}} = 0.0607$<br>$R_{\text{F}}^2 = 0.3544$ |                                       |
|                                       | Totals                   | $R_{\text{wp}} = 0.0212$<br>$R_{\text{p}} = 0.0845$                                                          | $R_{\text{wp}} = 0.0114$<br>$R_{\text{p}} = 0.0899$                                                          |                                       |
| No. of variables                      |                          | 119                                                                                                          | 131                                                                                                          |                                       |
| $\chi^2$                              |                          | 32.86                                                                                                        | 9.416                                                                                                        |                                       |
| No. of profile points                 | Neut. (bs)               | 3020                                                                                                         | 3025                                                                                                         |                                       |
|                                       | (90 $^{\circ}\text{C}$ ) | 1827                                                                                                         | 1827                                                                                                         |                                       |
|                                       | X-ray                    | 3290                                                                                                         | 3348                                                                                                         |                                       |

Table S4. Refined atomic parameters for BIGEVOX35 at 25 °C and 700 °C.

| 25 °C    |      |          |           |            |           |                                           |
|----------|------|----------|-----------|------------|-----------|-------------------------------------------|
| Atom     | Site | <i>x</i> | <i>y</i>  | <i>z</i>   | Occ.      | <i>U</i> <sub>iso</sub> (Å <sup>2</sup> ) |
| Bi       | 4e   | 0.0      | 0.0       | 0.16816(6) | 1.0       | 0.0346(5)                                 |
| M (V/Ge) | 2b   | 0.5      | 0.5       | 0.0        | 0.65/0.35 | 0.045(1)                                  |
| O(1)     | 4d   | 0.0      | 0.5       | 0.25       | 1.0       | 0.0260(5)                                 |
| O(2)     | 4e   | 0.5      | 0.5       | 0.1020(3)  | 0.337(5)  | 0.048(1)                                  |
| O(3)     | 32e  | 0.549(1) | 0.079(1)  | 0.0343(2)  | 0.0828    | 0.038(1)                                  |
| O(4)     | 16n  | 0.5      | 0.0279(1) | 0.0891(3)  | 0.166(1)  | 0.048(1)                                  |
| 700 °C   |      |          |           |            |           |                                           |
| Atom     | Site | <i>x</i> | <i>y</i>  | <i>z</i>   | Occ.      | <i>U</i> <sub>iso</sub> (Å <sup>2</sup> ) |
| Bi       | 4e   | 0.0      | 0.0       | 0.16841(5) | 1.0       | 0.0544(6)                                 |
| M (V/Ge) | 2b   | 0.5      | 0.5       | 0.0        | 0.65/0.35 | 0.064(1)                                  |
| O(1)     | 4d   | 0.0      | 0.5       | 0.25       | 1.0       | 0.0391(5)                                 |
| O(2)     | 4e   | 0.5      | 0.5       | 0.1028(3)  | 0.410(5)  | 0.059(1)                                  |
| O(3)     | 32e  | 0.575(2) | 0.068(2)  | 0.0284(2)  | 0.083     | 0.084(3)                                  |
| O(4)     | 16n  | 0.5      | 0.288(1)  | 0.0907(3)  | 0.147(1)  | 0.059(1)                                  |

Table S5. Significant contact distances in BIGEVOX35

| Temp.  | Bond    | Distance (Å) | Bond       | Distance (Å) |
|--------|---------|--------------|------------|--------------|
| 25 °C  | Bi-O(1) | 2.3326(6)    | V/Ge-O(2)  | 1.571(6)     |
|        | Bi-O(4) | 2.557(4)     | V/Ge-O(3)  | 1.746(5)     |
|        |         |              | V/Ge-O(3') | 2.343(5)     |
|        |         |              | V/Ge-O(4)  | 1.622(5)     |
|        |         |              | V/Ge-O(4)  | 1.622(5)     |
| 700 °C | Bi-O(1) | 2.3552(7)    | V/Ge-O(2)  | 1.596(4)     |
|        | Bi-O(4) | 2.590(4)     | V/Ge-O(3)  | 2.318(8)     |
|        |         |              | V/Ge-O(3') | 1.798(7)     |
|        |         |              | V/Ge-O(4)  | 1.640(6)     |

Table S6. Calculated V-O bond distances from Raman spectrum of BIGEVOX35.

| BIGEVOX35 | $\nu$ (cm <sup>-1</sup> ) | Area (%) | $r$ (Å) |
|-----------|---------------------------|----------|---------|
|           | 301.0                     | 18.40    | 2.22    |
|           | 361.0                     | 10.90    | 2.13    |
|           | 424.0                     | 4.84     | 2.04    |
|           | 504.0                     | 2.00     | 1.95    |
|           | 613.0                     | 0.32     | 1.85    |
|           | 659.0                     | 2.85     | 1.81    |
|           | 717.0                     | 6.76     | 1.77    |
|           | 768.0                     | 5.64     | 1.73    |
|           | 819.0                     | 25.28    | 1.70    |
|           | 859.0                     | 23.01    | 1.68    |
| Average   |                           |          | 1.87    |

Note:  $\nu$  is the wavenumber,  $r$  is the calculated bond length and  $s$  is the corresponding bond valence.
